# Supplementary material for: Decline of adolescent smoking in Ireland 1995–2015: trend analysis and associated factors
Source: PubMed Central journal article supplement (PMC5922513; doi:10.1136/bmjopen-2017-020708), 2018-04-27

## Appendix I: Real price per package of 20 cigarettes in Ireland, 1995-2015

| Year                       | 1995 | 1996 | 1997 | 1998 | 1999 | 2000 | 2001 | 2002 | 2003 | 2004 | 2005 | 2006 | 2007 | 2008 | 2009 | 2010 | 2011 | 2012 | 2013 | 2014 | 2015 |
|----------------------------|------|------|------|------|------|------|------|------|------|------|------|------|------|------|------|------|------|------|------|------|------|
| Retail price               | 3.5  | 3.6  | 3.8  | 3.9  | 4.1  | 4.8  | 4.9  | 5.2  | 5.8  | 6.2  | 6.3  | 6.4  | 7.0  | 7.9  | 8.4  | 8.5  | 8.6  | 9.1  | 9.5  | 10.0 | 10.5 |
| CPI (year 1995=100)        | 100  | 102  | 103  | 106  | 107  | 113  | 119  | 124  | 129  | 131  | 135  | 140  | 147  | 153  | 146  | 145  | 148  | 151  | 152  | 152  | 151  |
| Real price(base year=1995) | 3.5  | 3.6  | 3.6  | 3.7  | 3.8  | 4.2  | 4.1  | 4.2  | 4.5  | 4.7  | 4.6  | 4.6  | 4.8  | 5.2  | 5.7  | 5.8  | 5.8  | 6.0  | 6.2  | 6.6  | 6.9  |
| Real price change (%)      |      | 2.6  | 1.9  | 2.4  | 1.6  | 11.6 | -2.7 | 1.9  | 8.5  | 3.2  | -1.0 | -1.5 | 4.6  | 7.8  | 11.0 | 2.2  | -1.4 | 4.9  | 3.3  | 5.3  | 5.3  |

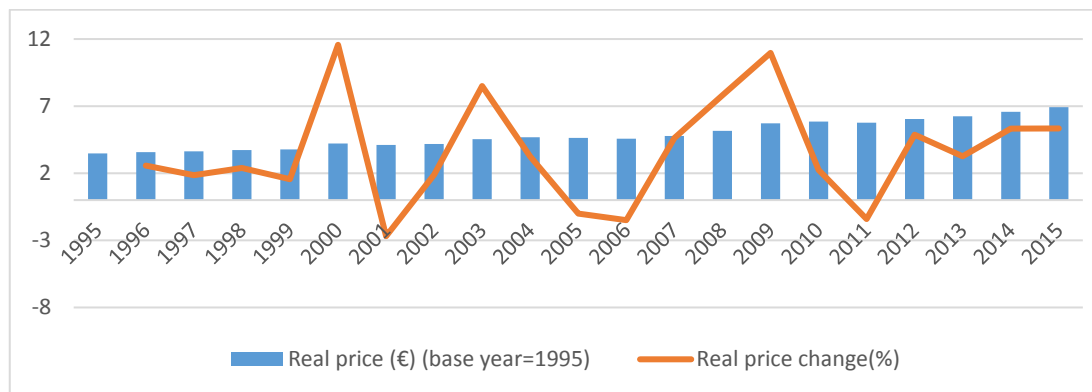

## Appendix II: Timestamps of Tobacco Control Policies in Ireland, 1995-2015

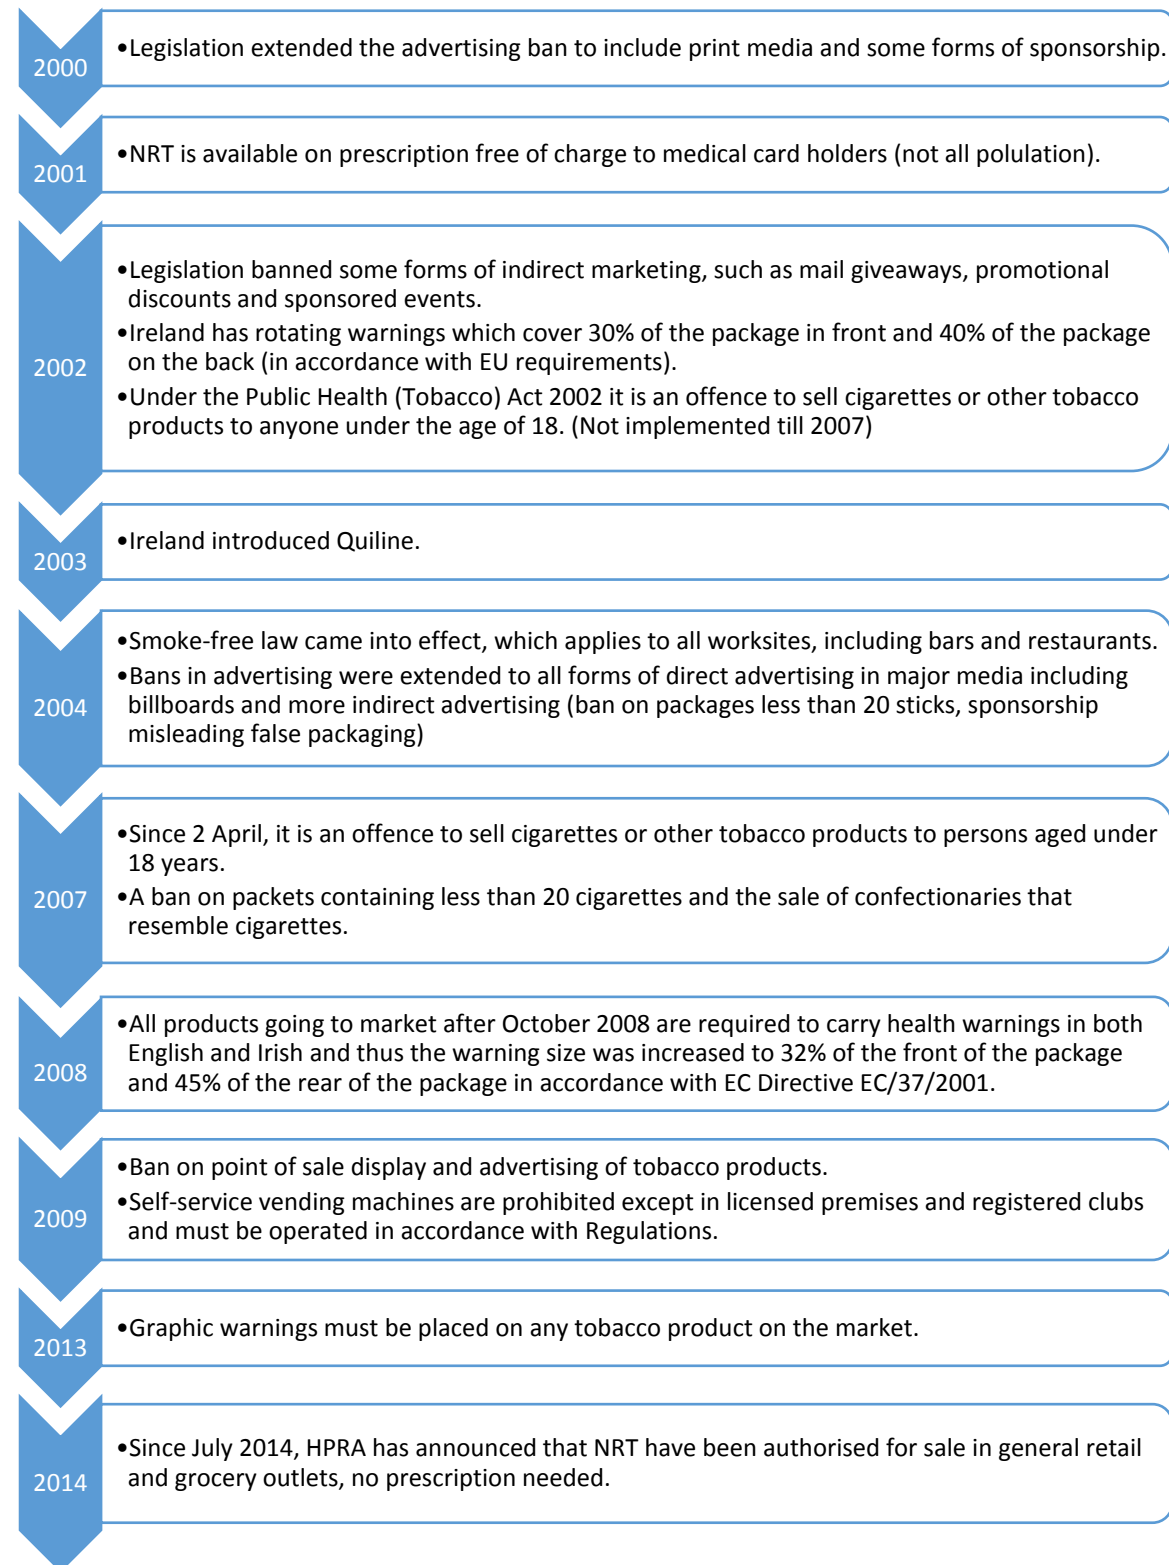

Supplement: bmjopen-2017-020708supp001.pdf [file bmjopen-2017-020708supp001.pdf]
